# Supplementary material for: Cocktail Strategy Based on NK Cell-Derived Exosomes and Their Biomimetic Nanoparticles for Dual Tumor Therapy
Source: MDPI journal article supplement (doi:10.3390/cancers11101560), 2019-10-14
Supplement: s1 [file s1]

## Supplementary Materials

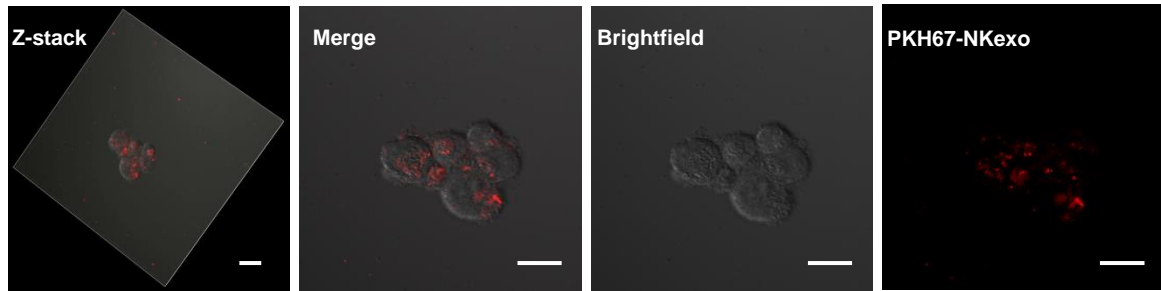

**Figure S1.** Confocal laser scanning microscopy examination of MDA-MB-231 cellular uptake of NKEXOs. Fluorescence images were taken after 24 h incubation with NKEXOs.

**Table S1.** Parameters of high-content screening (HCS) analysis.

|                                                 |                                                      |                                           |
|-------------------------------------------------|------------------------------------------------------|-------------------------------------------|
| <b>1. Input Image</b>                           | <b>6. Select Population (2)</b>                      | <b>11. Calculate Intensity Properties</b> |
| Stack Processing: Individual Planes             | Population:488 Selected                              | Channel: Alexa568                         |
| Flatfield Correction: Basic                     | Method: Filter by Property                           | Population: 568 Selected                  |
|                                                 | Intensity 488 Mean > 550*                            | Region: Image Region Alexa568             |
| <b>2. Find Image Region</b>                     | Output population: 488 Selected                      | Method: Standard (Mean)                   |
| Channel: Alexa488                               |                                                      | Output Properties: Intensity 568 Selected |
| ROI: None                                       | <b>7. Calculate Intensity Properties</b>             |                                           |
| Method: Common Threshold (0.47*)                | Channel: Alexa488                                    | <b>12. Calculate Intensity Properties</b> |
| Output population: Image Region 488             | Population: 488 Selected                             | Channel: Alexa488                         |
| Output Region: Image Region 488                 | Region: Image Region 488                             | Population:568 Selected                   |
|                                                 | Method: Standard (Mean)                              | Region: Image Region Alexa568             |
| <b>3. Calculate Morphology properties</b>       | Output Properties: Intensity 488 Selected            | Method: Standard (Mean)                   |
| Population: Image Region 488                    |                                                      | Output Properties: Intensity 488 in 568   |
| Region: Image Region 488                        | <b>8. Find Image Region</b>                          |                                           |
| Method: Standard                                | Channel: Alexa568                                    | <b>13. Select Population</b>              |
| Area: $\mu\text{m}^2$                           | ROI: None                                            | Population:568 Selected                   |
| Output Properties: Image Region 488             | Method: Common Threshold (0.34*)                     | Method: Filter by Property                |
|                                                 | Output population: Image Region 568                  | Intensity 488 in 568 > 550*               |
| <b>4. Select Population</b>                     | Output Region: Image Region 568                      | Output population: merge                  |
| Population: Image Region 488                    |                                                      |                                           |
| Method: Filter by Property                      | <b>9. Calculate Morphology properties</b>            | <b>14. Define Results</b>                 |
| Image Region 488 Area ( $\mu\text{m}^2$ ) < 20* | Population: Alexa568                                 | Method: List of Outputs                   |
| Output population: 488 Selected                 | Region: Image Region Alexa568                        | Method: Formula Output                    |
|                                                 | Method: Standard                                     | Formula: a/b                              |
| <b>5. Calculate Intensity Properties</b>        | Area: $\mu\text{m}^2$                                | Variable A: merge-Number of Objects       |
| Channel: Alexa488                               | Output Properties: Image Region Alexa568             | Variable B:568 Selected-Number            |
| Population:488 Selected                         |                                                      |                                           |
| Region: Image Region 488                        | <b>10. Select Population</b>                         |                                           |
| Method: Standard: Mean                          | Population: Alexa568                                 |                                           |
| Output Properties: Intensity 488                | Method: Filter by Property                           |                                           |
|                                                 | Image Region Alexa568 Area ( $\mu\text{m}^2$ ) < 30* |                                           |
|                                                 | Output population: 568 Selected                      |                                           |

\* indicate  $\mu\text{m}^2$ .

## Supplementary Videos

**Video S1.** A rotating 3D rendering of z-stack images showing the internalization of NKEXOs into MDA-MB-231-luc cells.

**Video S2.** Fluorescence signal of NN/NKEXO cocktail detected in the tumor tissues using TPEFI.
